# Supplementary material for: Fifty Years of Tidewater Glacier Surface Elevation and Retreat Dynamics along the South-East Coast of Spitsbergen (Svalbard Archipelago)
Source: MDPI journal article supplement (doi:10.3390/rs14020354), 2022-01-13
Supplement: s1 [file s1]

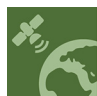**Table S1.** Source data used in the analyses.

| Dataset        | Date               | Purpose                                  | Source                          |
|----------------|--------------------|------------------------------------------|---------------------------------|
| 1970 DEM       | Summer 1970        | Elevation change; glacier front position | Norwegian Polar Institute (NPI) |
| Landsat 5      | 2.8.1990           | Glacier front position                   | Sentinel Hub EO browser         |
| NPI shapefiles | Summer 1990        | Glacier front position                   | Norwegian Polar Institute (NPI) |
| Landsat 7      | 28.8.2000          | Glacier front position                   | Sentinel Hub EO browser         |
| Landsat 5      | 12.8.2006          | Glacier front position                   | Sentinel Hub EO browser         |
| Landsat 5      | 28.6.2009          | Glacier front position                   | Sentinel Hub EO browser         |
| Landsat 7      | 11.9.2010          | Glacier front position                   | Sentinel Hub EO browser         |
| Landsat 7      | 26.7.2011          | Glacier front position                   | Sentinel Hub EO browser         |
| Landsat 7      | 5.7.2012           | Glacier front position                   | Sentinel Hub EO browser         |
| Landsat 8      | 24.8.2013          | Glacier front position                   | Sentinel Hub EO browser         |
| Landsat 8      | 22.8.2014          | Glacier front position                   | Sentinel Hub EO browser         |
| ArcticDEM      | Averaged to 2017 * | Elevation change                         | Polar Geospatial Data Center    |
| Sentinel-2     | 20.8.2017          | Glacier limits for DEM mask              | Sentinel Hub EO browser         |
| Sentinel-2     | 5.8.2019           | Glacier front position                   | Sentinel Hub EO browser         |

\* best fitness to 2017 when comparing to the glacier front positions
